# Supplementary material for: Inter-rater agreement between humans and computer in quantitative assessment of computed tomography after cardiac arrest
Source: PubMed Central journal article supplement (PMC9606648; doi:10.3389/fneur.2022.990208), 2022-10-13

# **Interrater Agreement between Humans and Computer in Quantitative Assessment of Computed Tomography after Cardiac Arrest**

-

## **Supplementary Material**

Martin Kenda, MD; Zhuo Cheng; Christopher Guettler, MD; Christian Storm, Prof., MD;

Christoph J. Ploner, Prof., MD; Christoph Leithner, MD; Michael Scheel, MD

**Supplementary Table 1** – Median (IQR) Gray-White Matter Ratios of n=95 patients per rater and neurological outcome.

| <b>Rater</b>     | <b>Good Outcome (CPC 1-3)</b><br><i>n=39</i> | <b>Poor Outcome (CPC 3-4)</b><br><i>n=56</i> | <b>p-value</b><br><b>MWU test</b> |
|------------------|----------------------------------------------|----------------------------------------------|-----------------------------------|
| Neuroradiologist | 1.27 (1.24-1.32)                             | 1.18 (1.10-1.25)                             | <0.01                             |
| Computer         | 1.30 (1.27-1.33)                             | 1.21 (1.12-1.26)                             | <0.01                             |
| Neurologist      | 1.28 (1.24-1.34)                             | 1.22 (1.12-1.28)                             | <0.01                             |
| Student          | 1.26 (1.22-1.29)                             | 1.18 (1.10-1.25)                             | <0.01                             |

**Supplementary Table 2** – Receiver Operating Characteristics (ROC) for prognostication of poor neurological outcome by GWR. p-Value (DeLong's test) for AUC-comparison with the neuroradiologist.

| <b>Rater</b>     | <b>Area under the ROC curve</b><br>(95% CI) | <b>% Specificity</b><br>at GWR<1.10<br>(95% CI) | <b>% Sensitivity</b> at<br>GWR<1.10<br>(95% CI) | <b>p-Value</b> (DeLong's<br>test vs.<br>Neuroradiologist) |
|------------------|---------------------------------------------|-------------------------------------------------|-------------------------------------------------|-----------------------------------------------------------|
| Neuroradiologist | 0.80 (0.71-0.89)                            | 100 (88-100)                                    | 29 (18-41)                                      |                                                           |
| Computer         | 0.80 (0.71-0.89)                            | 100 (88-100)                                    | 18 (9-29)                                       | 0.9482                                                    |
| Neurologist      | 0.74 (0.65-0.84)                            | 100 (88-100)                                    | 21 (11-32)                                      | 0.2434                                                    |
| Student          | 0.78 (0.69-0.87)                            | 100 (88-100)                                    | 27 (16-39)                                      | 0.6822                                                    |

## Supplementary Figure 1 – Patient selection and exclusions

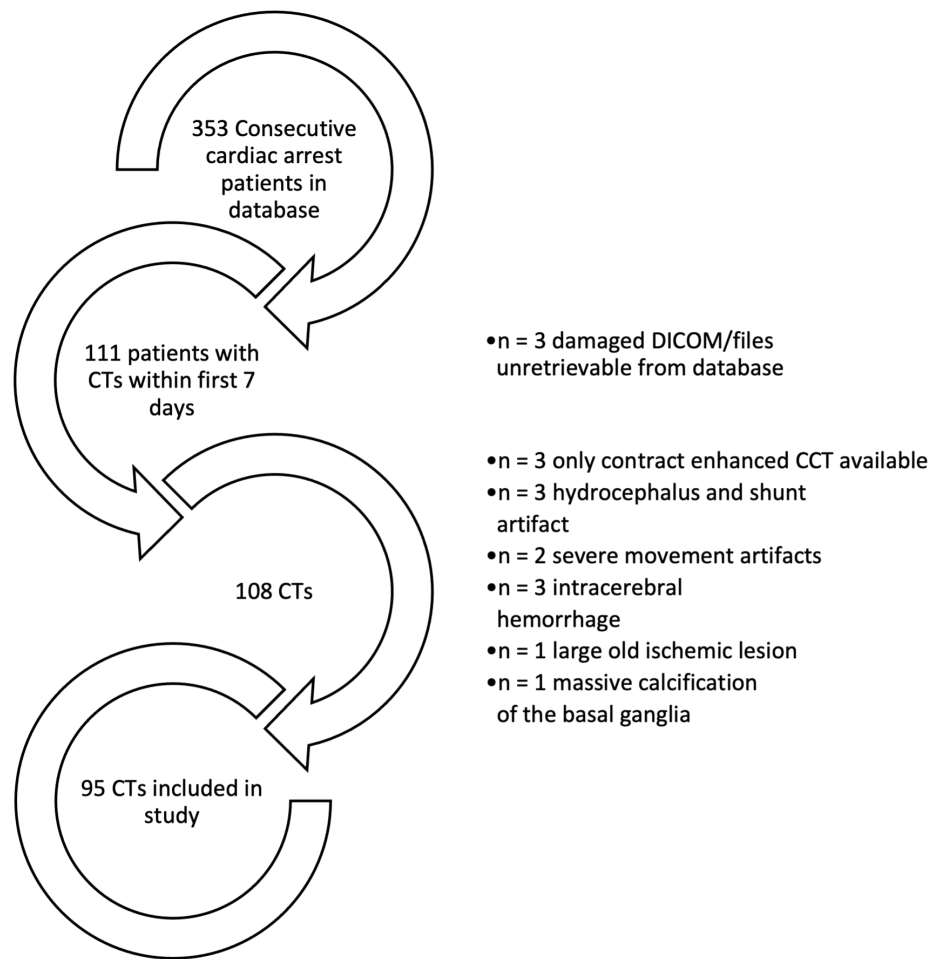

**Supplementary Figure 2** - Pairwise GWR values for  $n=95$  patients rated by **(A)** neuroradiologist/neurologist, **(B)** neuroradiologist/student. Blue pairs representing patients with good neurological outcome (CPC 1-3), red pairs with poor neurological outcome (CPC 4-5). Dots for neuroradiologist, triangles for neurologist (A) and student (B). Blue dotted line at GWR-cutoff = 1.10.

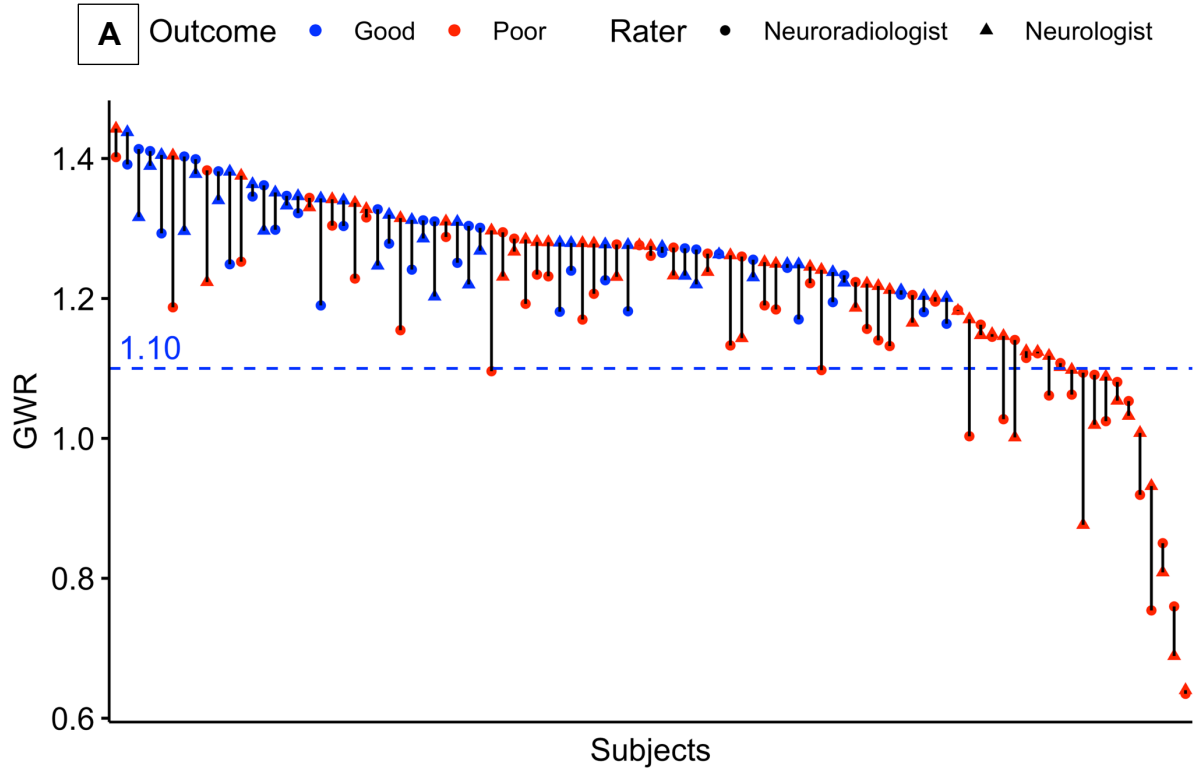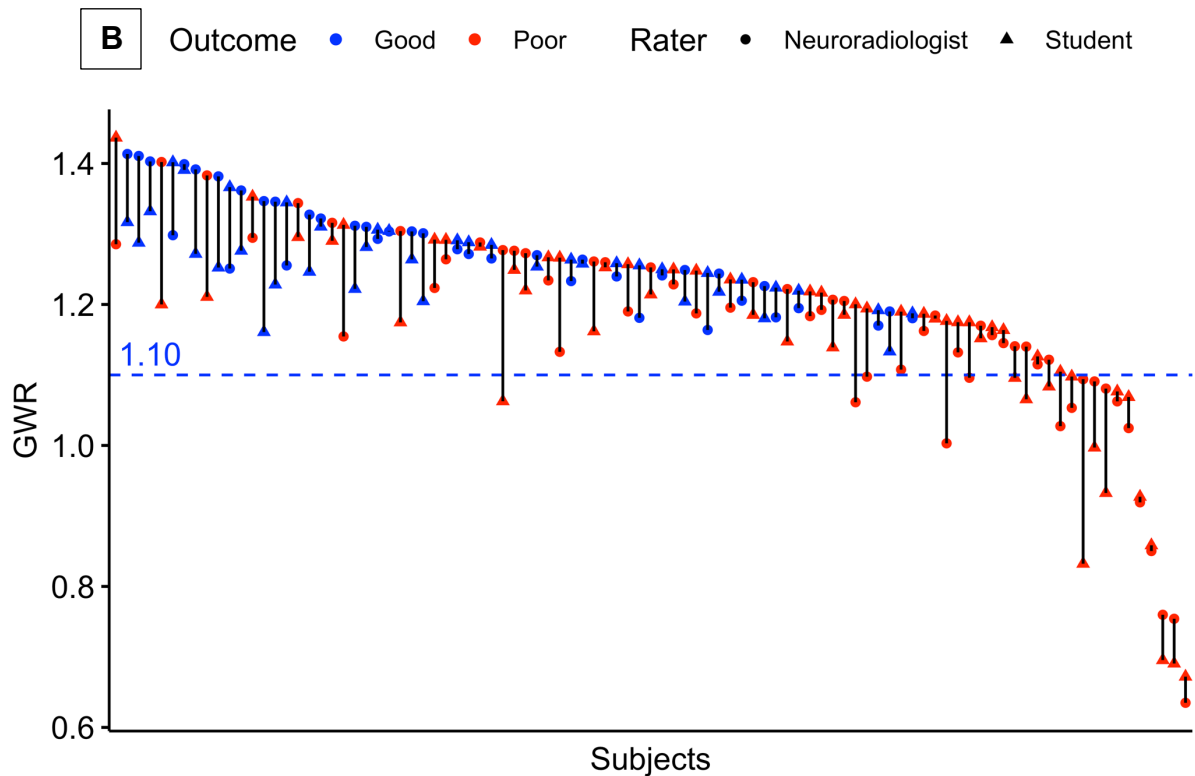

**Supplementary Figure 3** – ROI Placement for GWR assessment in Putamen and Posterior Limb of the internal Capsule (PLIC) in CTs of five patients after cardiac arrest with the biggest GWR-difference between Neuroradiologist (red) and Computer (cyan).

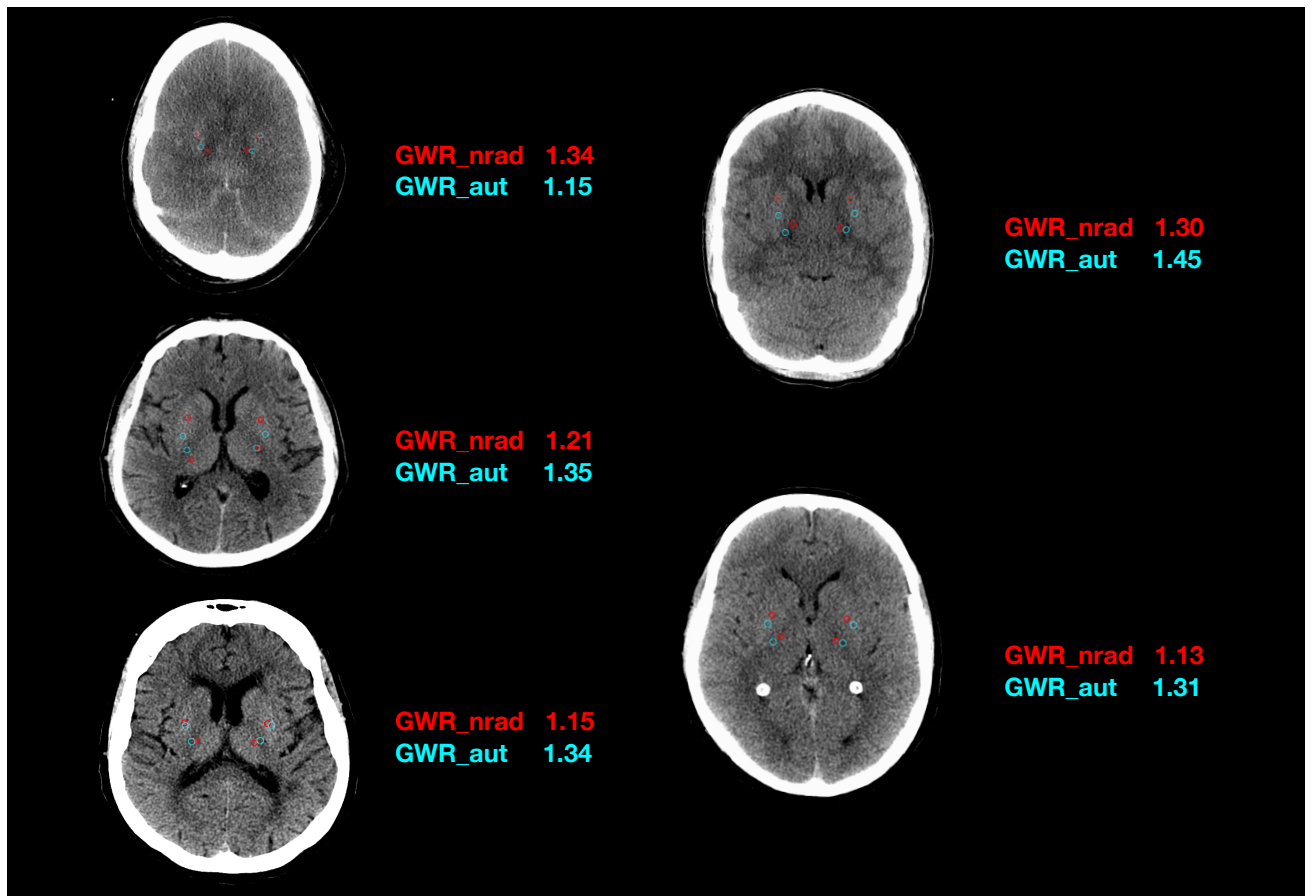

**Supplementary Figure 4** – ROI Placement for GWR assessment in Putamen and Posterior Limb of the internal Capsule (PLIC) in CTs of five CA patients with disagreements on GWR with respect to the pre-defined cutoff for “severe HIE” (<1.10) between Neuroradiologist (red) and Computer (cyan).

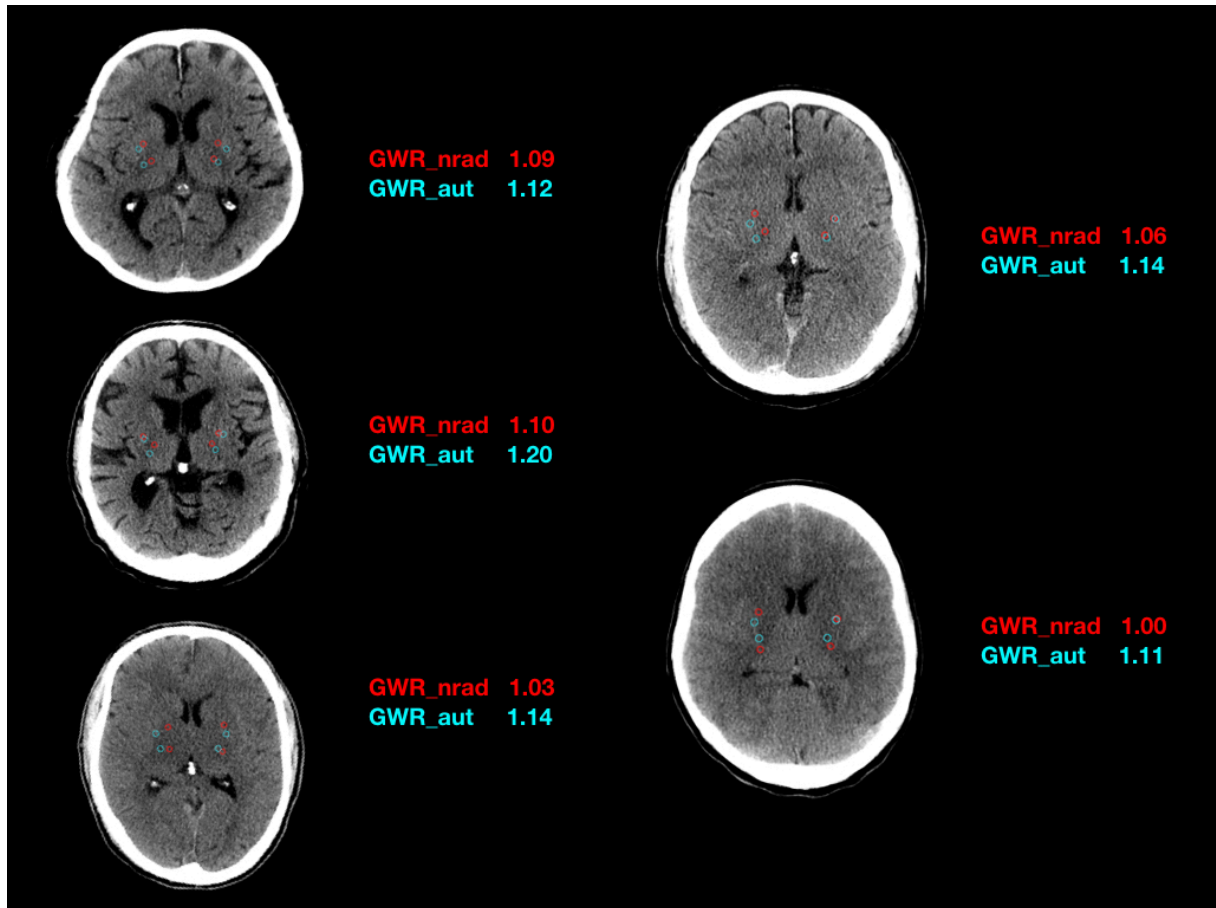

Supplement: Data_Sheet_1.pdf [file Data_Sheet_1.pdf]
